# Supplementary material for: Multidimensional assembly using layer-by-layer deposition for synchronized cardiac macro tissues
Source: Royal Society of Chemistry journal article supplement (doi:10.1039/d0ra01577f), 2020-01-01
Supplement: d0ra01577f1.pdf [file d0ra01577f1.pdf]

## Electronic Supplementary Information

### Multidimensional assembly using layer-by-layer deposition for synchronized cardiac macro tissues

*Yongjun Jang<sup>a</sup>, Da Jung Jung<sup>b</sup>, Seung-Cheol Choi<sup>c</sup>, Do-Sun Lim<sup>c</sup>, Jong-Hoon Kim<sup>d</sup>, Gi Seok jeoung<sup>b</sup>, Jongseong Kim<sup>\*a</sup> and Yongdoo Park<sup>\*a</sup>*

<sup>a</sup> Department of Biomedical Sciences, College of Medicine, Korea University, Seoul, Korea

<sup>b</sup> Biomedical Engineering Research Center, Asan Institute for Life Sciences, Asan Medical Center, Seoul, Korea

<sup>c</sup> Department of Cardiology, Cardiovascular Center, Korea University Anam Hospital, Seoul, Korea

<sup>d</sup> Department of Biotechnology, College of Life Sciences and Biotechnology, Korea University, Seoul, Korea

\*To whom correspondence should be addressed: [gsjeong@amc.seoul.kr](mailto:gsjeong@amc.seoul.kr), [envokim72@korea.ac.kr](mailto:envokim72@korea.ac.kr) or [ydpark67@korea.ac.kr](mailto:ydpark67@korea.ac.kr)

#### Contents:

**Figure S1-S7**

**Table S1-S4**

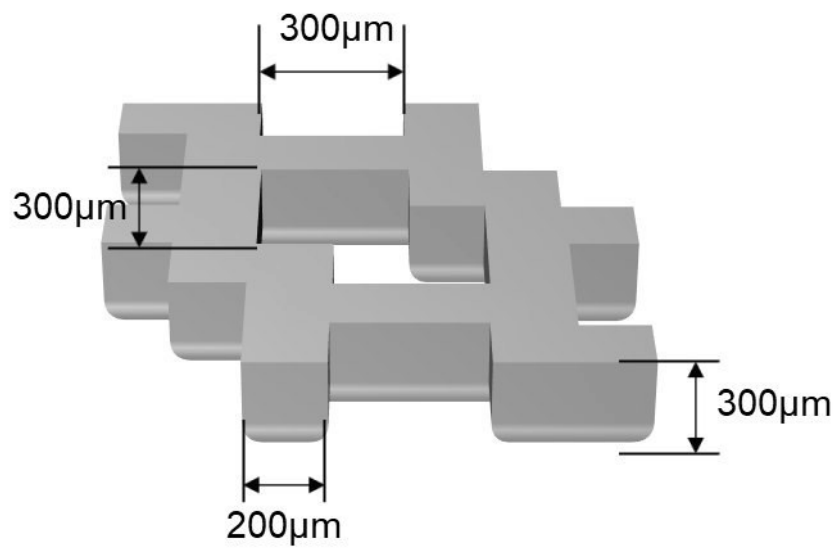

**Figure S1.** Geometric detail of accordion like honeycomb scaffold.

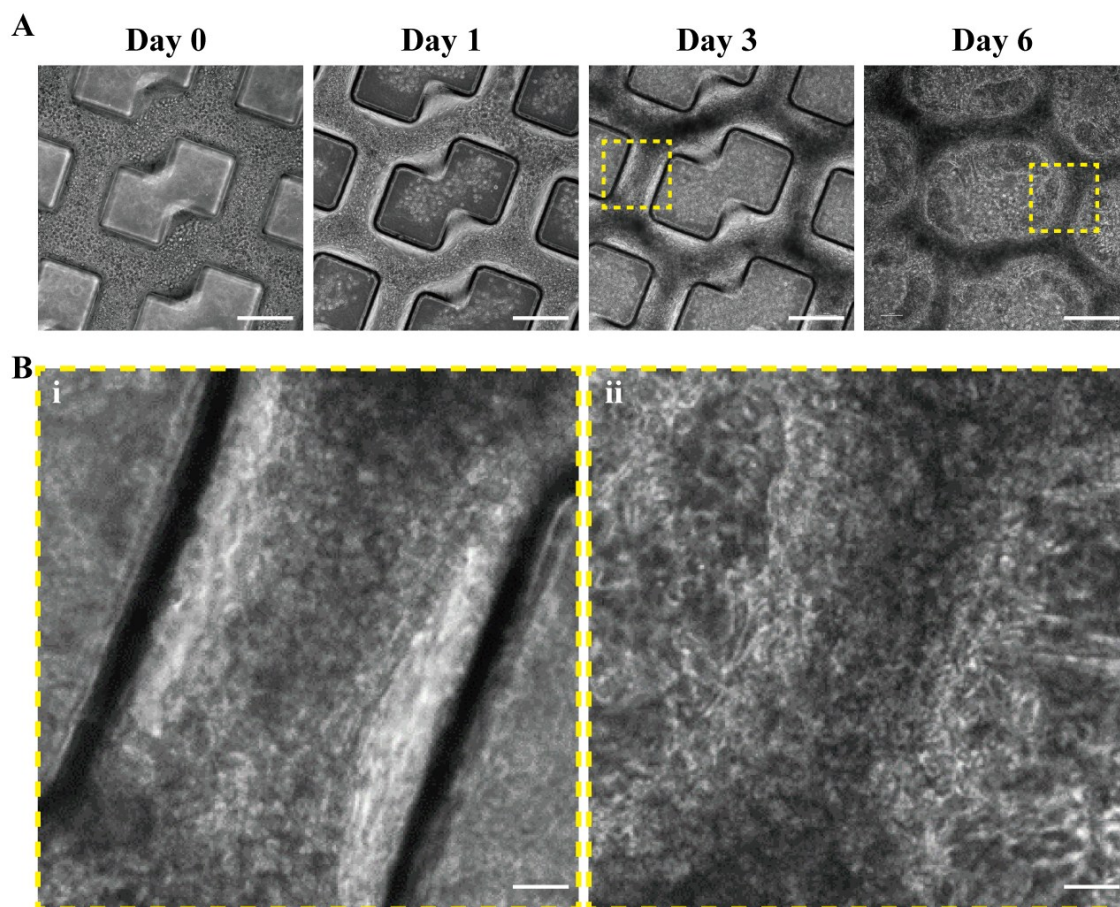

**Figure S2.** Bright field microscope image of cardiac patches by date. A) The cardiac patch in the mold on day 0, 1 and 2, and the detached cardiac patch on day 6. B) Magnified images of cardiac patches on day 3 (B i) and day 6 (B ii). Scale bars: 250  $\mu\text{m}$  in A, 1000  $\mu\text{m}$  in B.

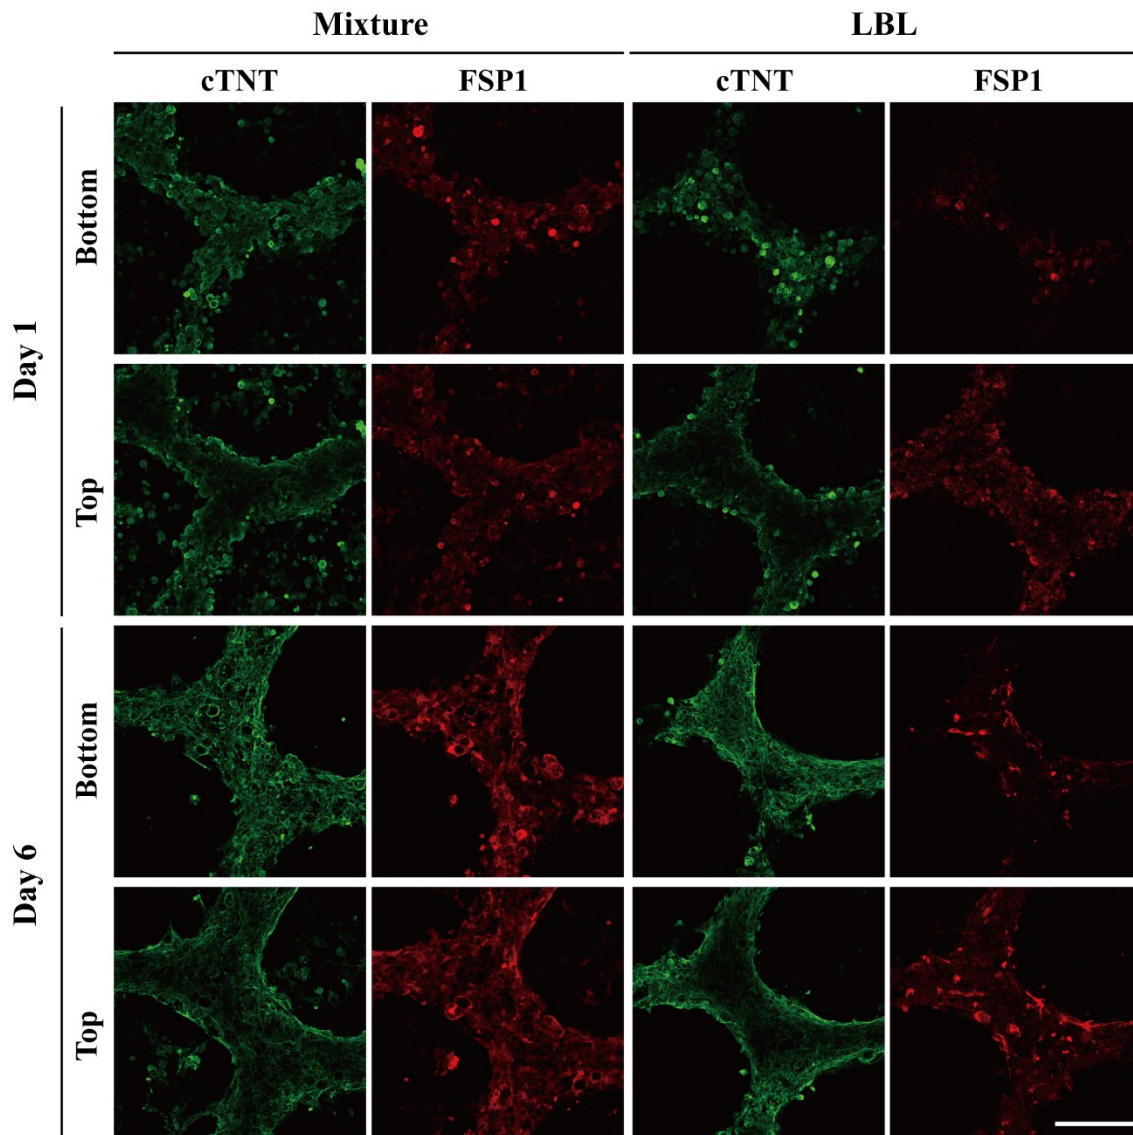

**Figure S3.** The fluorescence images of the cardiac and the fibroblast specific markers. The distribution of hPSC-derived CMs and CFBs in mCMT were shown for LBL and mixture deposition, respectively. Cardiac troponin T (cTNT; green) and fibroblast-specific protein 1 (FSP1; red) were immunohistochemically stained and imaged with separate channels, respectively. Scale bars are 200  $\mu$ m.

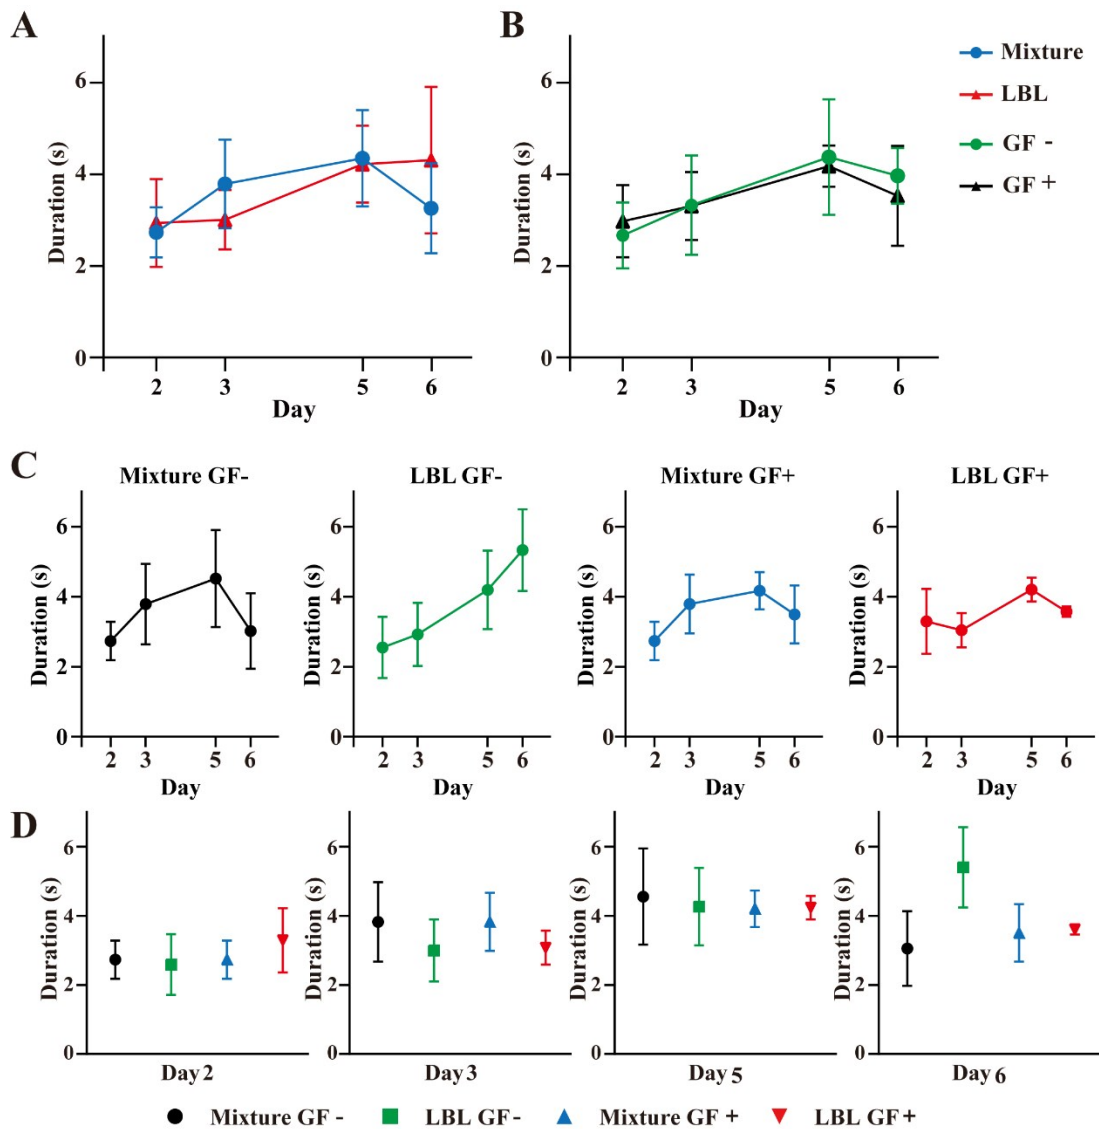

**Figure S4.** Statistical analysis of peak to peak (PTP) duration in cardiac beating (Figure 4) using ANOVA. Univariate analysis was performed to determine influence of cell deposition methods (A) and growth factors (B) on PTP duration (Day2: F-value (P) = 9.343 (0.003), Day3: F-value (P) = 0.080 (0.777), Day5: F-value (P) = 0.659 (0.419), Day6: F-value (P) = 47.041 (0.000)). The changes in PTP duration by incubation time for each group (C) and by all the groups at each day (D) are shown. Please see the Table S1, S2 and S3 for statistical analysis for each case. Note that the error bars were estimated by the standard deviations of 5 samples.

# LBL

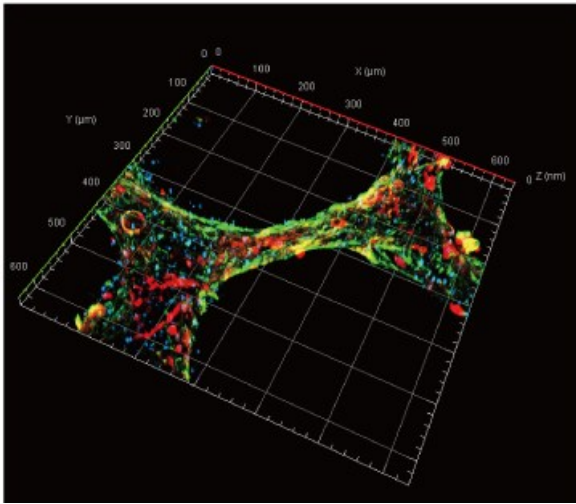

# Mixture

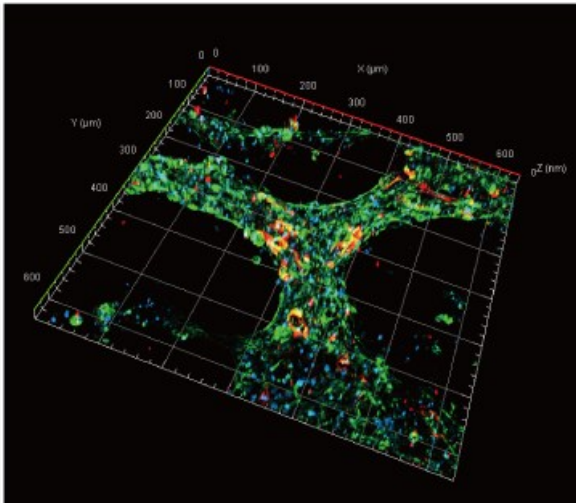

**Figure S5.** 3D reconstruction image of mCMTs by z-stack scanning using confocal microscope (Green: cTNT, Red: MLC2v, Blue: DAPI).

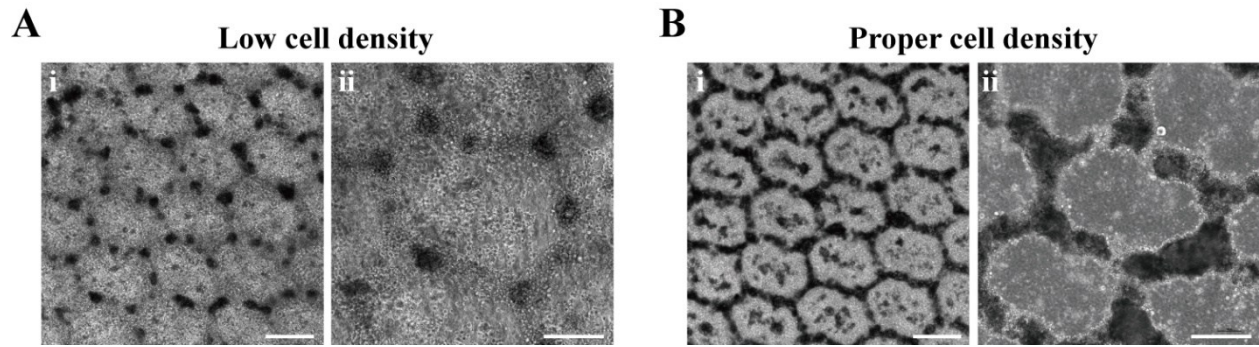

**Figure S6.** The cardiac patch assembly by cell density. The image of cardiac patch using two different cell densities (A for  $8 \times 10^5$  cells/patch and B for  $1.2 \times 10^6$  cells/patch). Scale bars: 500  $\mu\text{m}$  in A (i) and B (i), 250  $\mu\text{m}$  in A (ii) and B (ii).

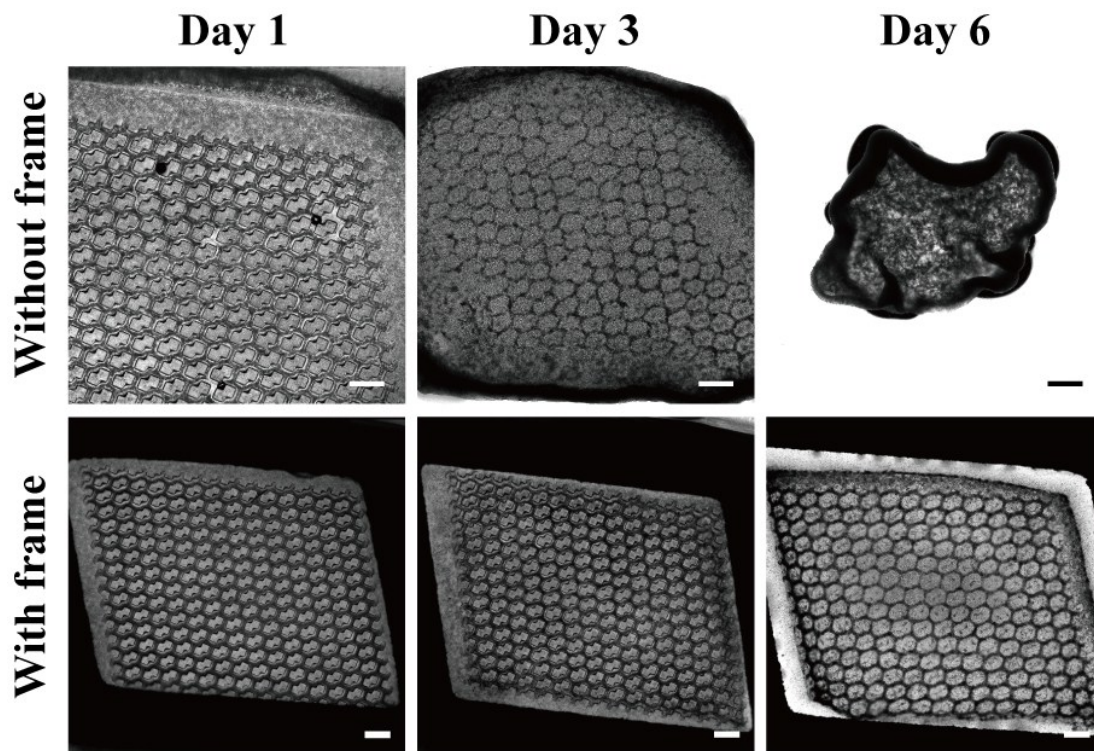

**Figure S7.** Bright field microscope images of mCMTs at day 1, 3, and 6 according to the presence or absence of the frame. Scale bars are 1000  $\mu\text{m}$ .



**Table S1.** Univariate analysis of PTP duration

| Univariate analysis (Day2) |          |                |      |    |
|----------------------------|----------|----------------|------|----|
| Deposition                 | Cytokine | Average        | SD   | N  |
| Mixture                    | GF-      | 2.73           | 0.55 | 44 |
|                            | GF+      | 2.73           | 0.55 | 45 |
|                            | All      | 2.73           | 0.55 | 89 |
| LBL                        | GF-      | 2.59           | 0.88 | 37 |
|                            | GF+      | 3.29           | 0.93 | 37 |
|                            | All      | 2.94           | 0.96 | 74 |
| All                        | GF-      | 2.67           | 0.72 | 81 |
|                            | GF+      | 2.98           | 0.79 | 82 |
| <b>F-value (P)</b>         |          | 9.343**(0.003) |      |    |

| Univariate analysis (Day5) |          |              |      |    |
|----------------------------|----------|--------------|------|----|
| Deposition                 | Cytokine | Average      | SD   | N  |
| Mixture                    | GF-      | 4.52         | 1.39 | 27 |
|                            | GF+      | 4.17         | 0.53 | 27 |
|                            | All      | 4.35         | 1.05 | 54 |
| LBL                        | GF-      | 4.23         | 1.12 | 25 |
|                            | GF+      | 4.20         | 0.34 | 22 |
|                            | All      | 4.22         | 0.84 | 47 |
| All                        | GF-      | 4.38         | 1.26 | 52 |
|                            | GF+      | 4.18         | 0.45 | 49 |
| <b>F-value (P)</b>         |          | 0.659(0.419) |      |    |

| Univariate analysis (Day3) |          |              |      |    |
|----------------------------|----------|--------------|------|----|
| Deposition                 | Cytokine | Average      | SD   | N  |
| Mixture                    | GF-      | 3.79         | 1.15 | 23 |
|                            | GF+      | 3.79         | 0.84 | 33 |
|                            | All      | 3.79         | 0.97 | 56 |
| LBL                        | GF-      | 2.96         | 0.90 | 29 |
|                            | GF+      | 3.04         | 0.49 | 57 |
|                            | All      | 3.01         | 0.65 | 86 |
| All                        | GF-      | 3.33         | 1.09 | 52 |
|                            | GF+      | 3.31         | 0.74 | 90 |
| <b>F-value (P)</b>         |          | 0.080(0.777) |      |    |

| Univariate analysis (Day6) |          |                  |      |    |
|----------------------------|----------|------------------|------|----|
| Deposition                 | Cytokine | Average          | SD   | N  |
| Mixture                    | GF-      | 3.02             | 1.08 | 31 |
|                            | GF+      | 3.49             | 0.83 | 34 |
|                            | All      | 3.26             | 0.98 | 65 |
| LBL                        | GF-      | 5.37             | 1.17 | 21 |
|                            | GF+      | 3.57             | 0.15 | 30 |
|                            | All      | 4.31             | 1.60 | 51 |
| All                        | GF-      | 3.97             | 0.61 | 52 |
|                            | GF+      | 3.53             | 1.09 | 64 |
| <b>F-value (P)</b>         |          | 47.041***(0.000) |      |    |

for influence of cell deposition methods and growth factors

\*P < 0.05, \*\*P < 0.01, \*\*\*P < 0.001

**Table S2.** One-way ANOVA analysis of PTP

duration by incubation time for each group.

| <b>Mixture GF-</b> |          |                |           |
|--------------------|----------|----------------|-----------|
| <b>Group</b>       | <b>N</b> | <b>Average</b> | <b>SD</b> |
| Day 2              | 44       | 2.73           | 0.55      |
| Day 3              | 23       | 3.79           | 1.15      |
| Day 5              | 27       | 4.52           | 1.39      |
| Day 6              | 31       | 3.02           | 1.08      |

**Dunnette T3 test (Levene, P=0.000)**

|                   |       |                  |     |
|-------------------|-------|------------------|-----|
| Day 2             | Day 3 | P = 0.002        | **  |
|                   | Day 5 | P = 0.000        | *** |
|                   | Day 6 |                  |     |
| Day 3             | Day 5 |                  |     |
|                   | Day 6 |                  |     |
| Day 5             | Day 6 | P = 0.000        | *** |
| <b>F-value(P)</b> |       | 19.498***(0.000) |     |

| <b>LBL GF-</b> |          |                |           |
|----------------|----------|----------------|-----------|
| <b>Group</b>   | <b>N</b> | <b>Average</b> | <b>SD</b> |
| Day 2          | 37       | 0.88           | 0.14      |
| Day 3          | 29       | 0.90           | 0.17      |
| Day 5          | 25       | 1.12           | 0.22      |
| Day 6          | 21       | 1.17           | 0.26      |

**Dunnette T3 test (Levene, P=0.003)**

|                   |       |                  |     |
|-------------------|-------|------------------|-----|
| Day 2             | Day 3 |                  |     |
|                   | Day 5 | P = 0.000        | *** |
|                   | Day 6 | P = 0.000        | *** |
| Day 3             | Day 5 | P = 0.000        | *** |
|                   | Day 6 | P = 0.000        | *** |
| Day 5             | Day 6 | P = 0.003        | **  |
| <b>F-value(P)</b> |       | 28.531***(0.000) |     |

| <b>Mixture GF+</b> |          |                |           |
|--------------------|----------|----------------|-----------|
| <b>Group</b>       | <b>N</b> | <b>Average</b> | <b>SD</b> |
| Day 2              | 45       | 2.73           | 0.08      |
| Day 3              | 33       | 3.79           | 0.15      |
| Day 5              | 27       | 4.17           | 0.10      |
| Day 6              | 34       | 3.49           | 0.14      |

**Dunnette T3 test (Levene, P=0.015)**

|                   |       |                  |     |
|-------------------|-------|------------------|-----|
| Day 2             | Day 3 | P = 0.000        | *** |
|                   | Day 5 | P = 0.000        | *** |
|                   | Day 6 | P = 0.000        | *** |
| Day 3             | Day 5 |                  |     |
|                   | Day 6 |                  |     |
| Day 5             | Day 6 | P = 0.003        | **  |
| <b>F-value(P)</b> |       | 28.284***(0.000) |     |

| <b>LBL GF+</b> |          |                |           |
|----------------|----------|----------------|-----------|
| <b>Group</b>   | <b>N</b> | <b>Average</b> | <b>SD</b> |
| Day 2          | 37       | 3.29           | 0.93      |
| Day 3          | 57       | 3.04           | 0.49      |
| Day 5          | 22       | 4.20           | 0.34      |
| Day 6          | 30       | 3.57           | 0.15      |

**Dunnette T3 test (Levene, P=0.003)**

|                   |       |                  |     |
|-------------------|-------|------------------|-----|
| Day 2             | Day 3 |                  |     |
|                   | Day 5 | P = 0.000        | *** |
|                   | Day 6 |                  |     |
| Day 3             | Day 5 | P = 0.000        |     |
|                   | Day 6 | P = 0.000        | *** |
| Day 5             | Day 6 | P = 0.000        | *** |
| <b>F-value(P)</b> |       | 22.488***(0.000) |     |

\*P < 0.05, \*\*P < 0.01, \*\*\*P < 0.001

**Table S3.** One-way ANOVA analysis of PTP duration

| Day 2       |    |         |      |
|-------------|----|---------|------|
| Group       | N  | Average | SD   |
| Mixture GF- | 44 | 2.73    | 0.55 |
| LBL GF-     | 37 | 2.59    | 0.88 |
| Mixture GF+ | 45 | 2.73    | 0.55 |
| LBL GF+     | 37 | 3.29    | 0.93 |

Scheffe's test (Levene, P=0.005)

|                   |             |                 |    |
|-------------------|-------------|-----------------|----|
| Mixture GF-       | LBL GF-     |                 |    |
|                   | Mixture GF+ |                 |    |
|                   | LBL GF+     | P = 0.014       | *  |
| LBL GF-           | Mixture GF+ |                 |    |
|                   | LBL GF+     | P = 0.009       | ** |
| Mixture GF+       | LBL GF+     | P = 0.012       | *  |
| <b>F-value(P)</b> |             | 6.695***(0.000) |    |

Day 5

| Group       | N  | Average | SD   |
|-------------|----|---------|------|
| Mixture GF- | 27 | 4.52    | 1.39 |
| LBL GF-     | 25 | 4.23    | 1.12 |
| Mixture GF+ | 27 | 4.17    | 0.53 |
| LBL GF+     | 22 | 4.20    | 0.34 |

Dunnett T3 test (Levene, P=0.000)

|                   |             |              |  |
|-------------------|-------------|--------------|--|
| Mixture GF-       | LBL GF-     |              |  |
|                   | Mixture GF+ |              |  |
|                   | LBL GF+     |              |  |
| LBL GF-           | Mixture GF+ |              |  |
|                   | LBL GF+     |              |  |
| Mixture GF+       | LBL GF+     |              |  |
| <b>F-value(P)</b> |             | 0.759(0.520) |  |

of all the groups at each day.

\*P < 0.05, \*\*p < 0.01, \*\*\*P < 0.001

| Day 3       |    |         |      |
|-------------|----|---------|------|
| Group       | N  | Average | SD   |
| Mixture GF- | 23 | 3.79    | 1.15 |
| LBL GF-     | 29 | 2.96    | 0.90 |
| Mixture GF+ | 33 | 3.79    | 0.84 |
| LBL GF+     | 57 | 3.04    | 0.49 |

Scheffe's test (Levene, P=0.000)

|                   |             |                  |     |
|-------------------|-------------|------------------|-----|
| Mixture GF-       | LBL GF-     | P = 0.041        | *   |
|                   | Mixture GF+ |                  |     |
|                   | LBL GF+     | P = 0.033        | *   |
| LBL GF-           | Mixture GF+ | P = 0.003        | **  |
|                   | LBL GF+     |                  |     |
| Mixture GF+       | LBL GF+     | P = 0.000        | *** |
| <b>F-value(P)</b> |             | 10.729***(0.000) |     |

Day 6

| Group       | N  | Average | SD   |
|-------------|----|---------|------|
| Mixture GF- | 31 | 3.02    | 1.08 |
| LBL GF-     | 21 | 5.37    | 1.16 |
| Mixture GF+ | 33 | 3.47    | 0.83 |
| LBL GF+     | 30 | 3.57    | 0.15 |

Dunnett T3 test (Levene, P=0.000)

|                   |             |                  |     |
|-------------------|-------------|------------------|-----|
| Mixture GF-       | LBL GF-     | P = 0.000        | *** |
|                   | Mixture GF+ |                  |     |
|                   | LBL GF+     | P = 0.045        | *   |
| LBL GF-           | Mixture GF+ | P = 0.000        | *** |
|                   | LBL GF+     | P = 0.000        | *** |
| Mixture GF+       | LBL GF+     |                  |     |
| <b>F-value(P)</b> |             | 32.927***(0.000) |     |

**Table S4.** List of primers used for quantitative PCR analysis

| <b>Gene</b>    | <b>Forward primer</b>                       | <b>Reverse primer</b>               | <b>Company</b>                    |
|----------------|---------------------------------------------|-------------------------------------|-----------------------------------|
| $\beta$ -actin | GGACCTGACTGACTACCTCAT                       | CGTAGCACAGCTTCTCCTTAAT              | Integrated DNA Technologies (USA) |
| MLC2v          | CGGAGAAGAGAAGGACTAGGA                       | ACAGACAAGGTAGGGACAGA                | Integrated DNA Technologies (USA) |
| cTNI           | GACAAGGTGGATGAAGAGAGATAC                    | CTTGCCTCGAAGGTCAAAGA                | Integrated DNA Technologies (USA) |
| cTNT           | CGATGGATTCCAGTTCGAGTATG                     | CTTGCAGTGGTAGGTGATGTT               | Integrated DNA Technologies (USA) |
| Piezol1        | GAGGGTGGAGGTGGAACAACCA<br>TGGTGAGCAAGGGCGCC | TCCACCTCCACCCTCCTTCTCA<br>CGAGTCCAC | Integrated DNA Technologies (USA) |
| Pre-Mir21      | TGTCGGGTAGCTTATCAGAC                        | TGTCAGACAGCCCATCGACT                | Integrated DNA Technologies (USA) |
| GJA1           | GGTGACTGGAGCGCCTTAG                         | GCGCACATGAGAGATTGGGA                | Integrated DNA Technologies (USA) |
